# Supplementary material for: Quercetin-induced cardioprotection against doxorubicin cytotoxicity
Source: PubMed Central journal article supplement (PMC3898810; doi:10.1186/1423-0127-20-95), 2013-12-20
Supplement: 1423-0127-20-95-S1.pdf [file 1423-0127-20-95-S1.pdf]

**Table S1. Differentially expressed proteins were listed alphabetically after 2D-DIGE and MALDI-TOF Mass spectrometry analysis in H9C2 cells in response to doxorubicin treated and pre-treated with querc**

| No.  | Swissprot No. | Protein name                                      | Theoretical MW | Theoretical pI | Observed MW | Observed pI | No. Match. Peptides | Cov. (%) | MOWSE Score | Functional classification | Subcellular location  | IC50 / Ctrl | t-test | Que / Ctrl | t-test   | Que / IC50 | t-test   |
|------|---------------|---------------------------------------------------|----------------|----------------|-------------|-------------|---------------------|----------|-------------|---------------------------|-----------------------|-------------|--------|------------|----------|------------|----------|
| 977  | P62198        | 26S protease regulatory subunit 8                 | 45768          | 7.11           | 50000       | 8.5         | 6/25                | 16       | 65/56       | Protein degradation       | Cytoplasm             | -1.1        | 0.33   | -1.54      | 0.012    | -1.4       | 0.041    |
| 660  | P63039        | 60 kDa heat shock protein, mitochondrial/HSP-60   | 61088          | 5.91           | 61000       | 6.0         | 10/17               | 13       | 108/56      | Protein folding           | Mitochondria          | 1.23        | 0.22   | -1.58      | 0.075    | -1.94      | 0.007    |
| 376  | P06761        | 78 kDa glucose-regulated protein/GRP-78           | 72473          | 5.07           | 75000       | 5.0         | 12/27               | 21       | 106/56      | Protein folding           | Endoplasmic reticulum | 1.41        | 0.08   | 1.79       | 0.022    | 1.27       | 0.2      |
| 444  | P06761        | 78 kDa glucose-regulated protein/GRP-78           | 72473          | 5.07           | 72000       | 4.9         | 10/20               | 17       | 98/56       | Protein folding           | Endoplasmic reticulum | 1.63        | 0.35   | -1.85      | 0.26     | -3.02      | 0.026    |
| 1178 | Q5XI22        | Acetyl-CoA acetyltransferase, cytosolic           | 41538          | 6.86           | 45000       | 8.3         | 7/14                | 19       | 94/56       | TCA cycle                 | Mitochondria          | -1.61       | 0.0047 | -2.61      | 0.00064  | -1.62      | 0.018    |
| 384  | Q9ER34        | Aconitate hydratase, mitochondrial/Aconitase      | 86121          | 7.87           | 80000       | 8.7         | 7/10                | 11       | 108/56      | TCA cycle                 | Mitochondrion         | 1.25        | 0.15   | -1.58      | 0.053    | -1.97      | 0.018    |
| 390  | Q9ER34        | Aconitate hydratase, mitochondrial/Aconitase      | 86121          | 7.87           | 80000       | 8.8         | 8/18                | 13       | 103/56      | TCA cycle                 | Mitochondrion         | 1.29        | 0.0025 | -2.42      | 2.20E-06 | -3.13      | 7.60E-07 |
| 1021 | P60711        | Actin, cytoplasmic 1                              | 42052          | 5.29           | 49000       | 4.0         | 6/18                | 18       | 102/56      | Cytoskeleton              | Cytoplasm             | 1.26        | 0.11   | 2.1        | 0.0034   | 1.67       | 0.0088   |
| 1117 | P60711        | Actin, cytoplasmic 1                              | 42052          | 5.29           | 48000       | 6.5         | 5/10                | 16       | 80/56       | Cytoskeleton              | Cytoplasm             | -1.23       | 0.15   | 1.87       | 0.0092   | 2.31       | 0.0022   |
| 1297 | P60711        | Actin, cytoplasmic 1                              | 42052          | 5.29           | 43000       | 6.3         | 5/10                | 18       | 82/56       | Cytoskeleton              | Cytoplasm             | 1.03        | 0.69   | 2.15       | 0.002    | 2.08       | 0.0033   |
| 1361 | P60711        | Actin, cytoplasmic 1                              | 42052          | 5.29           | 42000       | 4.5         | 5/10                | 15       | 80/56       | Cytoskeleton              | Cytoplasm             | 1.03        | 0.78   | 2.05       | 0.00054  | 1.98       | 0.00056  |
| 1646 | P60711        | Actin, cytoplasmic 1                              | 42052          | 5.29           | 30000       | 5.5         | 5/10                | 16       | 66/56       | Cytoskeleton              | Cytoplasm             | 1.14        | 0.4    | 1.6        | 3.60E-05 | 1.41       | 0.019    |
| 1026 | P60711        | Actin, cytoplasmic 1                              | 42052          | 5.29           | 49000       | 6.1         | 9/19                | 26       | 81/56       | Cytoskeleton              | Cytoplasm             | 1.16        | 0.21   | 1.63       | 0.029    | 1.4        | 0.093    |
| 1898 | P23928        | Alpha-crystallin B chain                          | 20076          | 6.76           | 20000       | 8.5         | 6/22                | 25       | 72/56       | Protein folding           | Cytoplasm             | 1.38        | 0.03   | -1.19      | 0.28     | -1.64      | 0.011    |
| 1901 | P23928        | Alpha-crystallin B chain                          | 20076          | 6.76           | 20000       | 8.5         | 5/14                | 25       | 75/56       | Protein folding           | Cytoplasm             | 1.19        | 0.29   | -1.41      | 0.13     | -1.68      | 0.021    |
| 1475 | Q07936        | Annexin A2                                        | 38939          | 7.55           | 40000       | 7.8         | 7/13                | 23       | 101/56      | Signal transduction       | Secreted              | 1.02        | 0.89   | 1.54       | 0.04     | 1.5        | 0.031    |
| 863  | P15999        | ATP synthase subunit alpha, mitochondrial         | 59831          | 9.22           | 55000       | 8.6         | 5/11                | 15       | 82/56       | ATP synthesis             | Mitochondria          | 1.16        | 0.24   | -2.03      | 0.0046   | -2.35      | 0.0018   |
| 871  | P15999        | ATP synthase subunit alpha, mitochondrial         | 59831          | 9.22           | 52000       | 8.8         | 8/16                | 16       | 119/56      | ATP synthesis             | Mitochondria          | 1.44        | 0.024  | -1.58      | 0.003    | -2.28      | 3.20E-05 |
| 887  | P10719        | ATP synthase subunit beta, mitochondrial          | 56318          | 5.19           | 52000       | 4.9         | 6/13                | 13       | 74/56       | ATP synthesis             | Mitochondria          | 1.13        | 0.26   | -1.62      | 0.0068   | -1.84      | 0.0033   |
| 612  | O35567        | Bifunctional purine biosynthesis protein PURH/IMP | 64681          | 6.69           | 65000       | 8.0         | 8/21                | 15       | 103/56      | Purine biosynthesis       | Mitochondria          | -1.05       | 0.7    | -1.73      | 0.0038   | -1.65      | 0.0045   |

|      |        |                                                             |        |      |       |      |       |    |        |                         |                 |       |        |       |          |       |          |
|------|--------|-------------------------------------------------------------|--------|------|-------|------|-------|----|--------|-------------------------|-----------------|-------|--------|-------|----------|-------|----------|
| 485  | P14141 | Carbonic anhydrase 3                                        | 29698  | 6.98 | 70000 | 9.1  | 6/18  | 32 | 83/56  | Hemostasis              | Cytoplasm       | -1.18 | 0.37   | -1.53 | 0.042    | -1.3  | 0.047    |
| 1645 | P14141 | Carbonic anhydrase 3                                        | 29698  | 6.89 | 30000 | 8.5  | 5/12  | 28 | 93/56  | Hemostasis              | Cytoplasm       | -1.17 | 0.29   | 1.29  | 0.078    | 1.5   | 0.01     |
| 1954 | P45592 | Cofilin-1                                                   | 18749  | 8.22 | 18000 | 7.4  | 7/12  | 31 | 83/56  | Cytoskeleton regulation | Cytoplasm       | 1.33  | 0.0039 | -1.21 | 0.03     | -1.62 | 0.00096  |
| 1971 | Q7M0E3 | Destrin                                                     | 18807  | 8.19 | 18000 | 7.8  | 5/13  | 23 | 66/56  | Cytoskeleton regulation | Cytoplasm       | 1.51  | 0.0023 | -1.09 | 0.2      | -1.64 | 0.0012   |
| 819  | P97679 | DNA mismatch repair protein Mlh1                            | 85171  | 5.63 | 55000 | 8.8  | 7/14  | 7  | 68/56  | DNA repair              | Nucleus         | 1.46  | 0.006  | -1.66 | 0.0045   | -2.42 | 0.0004   |
| 972  | P63036 | DnaJ homolog subfamily A member 1                           | 45581  | 6.65 | 50000 | 8.6  | 7/12  | 14 | 69/56  | Protein folding         | Mitochondria    | -1.72 | 0.34   | -3.39 | 0.023    | -1.97 | 0.0082   |
| 280  | P05197 | Elongation factor 2/EF-2                                    | 96192  | 6.41 | 90000 | 8.2  | 8/10  | 8  | 85/56  | Translational control   | Cytoplasm       | -1.07 | 0.59   | -1.81 | 0.0042   | -1.68 | 0.0032   |
| 461  | P09759 | Ephrin type-B receptor 1                                    | 111352 | 6.03 | 72000 | 8.2  | 6/15  | 7  | 58/56  | Signal transduction     | Plasma membrane | -1.09 | 0.22   | -2.32 | 0.00039  | -2.13 | 0.00064  |
| 1257 | B0BNA7 | Eukaryotic translation initiation factor 3 subunit I/eIF3i  | 36837  | 5.38 | 44000 | 6.1  | 6/17  | 23 | 94/56  | Translational control   | Cytoplasm       | -1.07 | 0.61   | 1.74  | 0.036    | 1.87  | 0.02     |
| 1020 | O54924 | Exocyst complex component 8                                 | 81676  | 5.3  | 48000 | 4.2  | 8/13  | 13 | 72/56  | Exocytosis              | Cytoplasm       | 1.12  | 0.52   | 1.96  | 0.0033   | 1.75  | 0.0031   |
| 952  | P31977 | Ezrin                                                       | 69462  | 5.83 | 50000 | 10.5 | 9/16  | 11 | 69/56  | Cytoskeleton            | Cytoplasm       | -1.15 | 0.38   | -1.72 | 0.0023   | -1.5  | 0.026    |
| 869  | P10860 | Glutamate dehydrogenase 1, mitochondrial/GDH 1              | 61719  | 8.08 | 55000 | 8.3  | 6/10  | 12 | 88/56  | Redox regulation        | Mitochondria    | 1.37  | 0.0026 | -1.39 | 0.00034  | -1.91 | 5.00E-05 |
| 1803 | P62828 | GTP-binding nuclear protein Ran                             | 24579  | 7.07 | 23000 | 8.4  | 5/11  | 26 | 91/56  | Cell cycle              | Nucleus         | -1.32 | 0.012  | -2.63 | 4.30E-05 | -2    | 6.40E-05 |
| 1628 | P63018 | Heat shock cognate 71 kDa protein                           | 71055  | 5.37 | 30000 | 5.0  | 6/17  | 14 | 85/56  | Protein folding         | Cytoplasm       | 1.73  | 0.038  | 2.69  | 0.004    | 1.56  | 0.062    |
| 1731 | P42930 | Heat shock protein beta-1                                   | 22936  | 6.2  | 25000 | 7.2  | 6/17  | 33 | 97/56  | Protein folding         | Cytoplasm       | -1.49 | 0.036  | -1.97 | 0.0028   | -1.32 | 0.057    |
| 1177 | Q07523 | Hydroxyacid oxidase 2/HAOX2                                 | 39633  | 7.55 | 45000 | 5.4  | 5/20  | 17 | 62/56  | Redox regulation        | Peroxisome      | 1.01  | 0.97   | 1.63  | 0.01     | 1.62  | 0.1      |
| 1201 | Q99NA5 | Isocitrate dehydrogenase [NAD] subunit alpha, mitochondrial | 40044  | 6.47 | 44000 | 6.4  | 7/24  | 17 | 80/56  | TCA cycle               | Mitochondria    | 1.33  | 0.03   | 1.78  | 0.0031   | 1.34  | 0.011    |
| 1079 | P41562 | Isocitrate dehydrogenase [NADP] cytoplasmic/IDH             | 47047  | 6.53 | 47000 | 8.0  | 5/16  | 11 | 60/56  | Redox regulation        | Cytoplasm       | 1.26  | 0.01   | -1.51 | 0.0011   | -1.9  | 0.0002   |
| 458  | P48679 | Lamin-A                                                     | 74564  | 6.54 | 72000 | 7.9  | 7/20  | 11 | 75/56  | Nuclear assembly        | Nucleus         | 1.31  | 0.079  | -1.54 | 0.093    | -2.01 | 0.022    |
| 570  | P48679 | Lamin-A                                                     | 74564  | 6.54 | 68000 | 7.9  | 10/23 | 15 | 125/56 | Nuclear assembly        | Nucleus         | -1.05 | 0.59   | -1.64 | 0.0011   | -1.56 | 0.0048   |
| 296  | Q6AXU7 | MIF4G domain-containing protein                             | 25854  | 5.03 | 80000 | 5.4  | 5/16  | 22 | 65/56  | Translational control   | Nucleus         | 1.12  | 0.33   | -1.6  | 0.00031  | -1.79 | 0.00077  |
| 786  | P63086 | Mitogen-activated protein kinase 1/MAP kinase 1             | 41648  | 6.5  | 58000 | 5.3  | 6/20  | 21 | 61/56  | Signal transduction     | Cytoplasm       | 1.01  | 0.86   | -2.01 | 0.00097  | -2.03 | 0.00048  |

|      |        |                                                     |       |      |       |     |       |    |        |                         |                       |       |        |       |         |       |         |
|------|--------|-----------------------------------------------------|-------|------|-------|-----|-------|----|--------|-------------------------|-----------------------|-------|--------|-------|---------|-------|---------|
| 1494 | O35763 | Moesin                                              | 67868 | 6.16 | 30000 | 9.8 | 6/8   | 7  | 63/56  | Cytoskeleton            | Plasma membrane       | 1.32  | 0.065  | 1.63  | 0.0053  | 1.24  | 0.0094  |
| 650  | P13697 | NADP-dependent malic enzyme/NADP-ME                 | 64589 | 6.49 | 62000 | 7.6 | 5/13  | 9  | 71/56  | Redox regulation        | Cytoplasm.            | -1.04 | 0.5    | -1.59 | 0.0022  | -1.54 | 0.0033  |
| 2016 | Q05982 | Nucleoside diphosphate kinase A/NDK A               | 17296 | 5.69 | 17000 | 6.8 | 4/11  | 31 | 76/56  | DNA synthesis           | Nucleus               | 1.16  | 0.0016 | -1.32 | 0.21    | -1.53 | 0.037   |
| 1426 | P52944 | PDZ and LIM domain protein 1                        | 36018 | 6.79 | 40000 | 8.1 | 6/17  | 25 | 94/56  | Cytoskeleton regulation | Cytoplasm             | 1.52  | 0.003  | 1.12  | 0.13    | -1.36 | 0.0073  |
| 1696 | O35244 | Peroxiredoxin-6                                     | 24860 | 5.64 | 26000 | 6.6 | 6/12  | 29 | 90/56  | Redox regulation        | Cytoplasm             | 1.33  | 0.12   | -1.18 | 0.34    | -1.57 | 0.0084  |
| 1632 | P25113 | Phosphoglycerate mutase 1                           | 28928 | 6.67 | 30000 | 8.1 | 6/21  | 35 | 95/56  | Glycolysis              | Cytoplasm             | 1.07  | 0.63   | -1.52 | 0.0067  | -1.63 | 0.0041  |
| 440  | Q9ERS1 | Potassium channel subfamily K member 12             | 48075 | 9.83 | 72000 | 7.4 | 6/12  | 15 | 60/56  | Ion transport           | Plasma membrane       | 1.25  | NA     | -1.52 | NA      | -1.9  | 0.007   |
| 608  | P54001 | Prolyl 4-hydroxylase subunit alpha-1/4-PH alpha-1   | 61202 | 5.63 | 62000 | 6.5 | 5/17  | 10 | 58/56  | Collagen formation      | Endoplasmic reticulum | -1.24 | 0.026  | -1.63 | 0.0094  | -1.32 | 0.049   |
| 1346 | O35569 | Pro-neuregulin-2, membrane-bound isoform/Pro-NRG2   | 95258 | 9.52 | 42000 | 5.0 | 8/17  | 7  | 65/56  | Signal transduction     | Secreted              | 1.04  | 0.7    | -1.49 | 0.015   | -1.55 | 0.014   |
| 1187 | Q63081 | Protein disulfide-isomerase A6/PDIA6                | 48542 | 5    | 45000 | 7.1 | 5/14  | 15 | 81/56  | Protein folding         | Endoplasmic reticulum | -1.01 | 0.99   | 1.64  | 0.083   | 1.67  | 0.0051  |
| 423  | Q562C7 | Pumilio domain-containing protein KIAA0020 homolog  | 73196 | 9.7  | 72000 | 7.1 | 7/17  | 12 | 66/56  | Translational control   | Nucleus               | 1.56  | 0.0046 | -1.06 | 0.34    | -1.66 | 0.0021  |
| 676  | P11980 | Pyruvate kinase isozymes M1/M2                      | 58294 | 6.63 | 60000 | 8.8 | 7/24  | 17 | 84/56  | Glycolysis              | Cytoplasm             | 1.14  | 0.13   | -1.38 | 0.009   | -1.57 | 0.0028  |
| 926  | P50399 | Rab GDP dissociation inhibitor beta/Rab GDI beta    | 51018 | 5.93 | 50000 | 6.9 | 9/14  | 17 | 89/56  | Signal transduction     | Plasma membrane       | -1.14 | 0.67   | 1.51  | 0.12    | 1.73  | 0.036   |
| 1094 | P51647 | Retinal dehydrogenase 1/RALDH 1                     | 54994 | 7.94 | 46000 | 8.0 | 5/15  | 10 | 58/56  | Redox regulation        | Cytoplasm             | -1.02 | 0.91   | -1.68 | 0.0088  | -1.65 | 0.0065  |
| 1237 | P16975 | SPARC                                               | 35129 | 4.81 | 44000 | 4.4 | 6/13  | 20 | 81/56  | Growth regulation       | Secreted              | -2.12 | 0.0047 | -2.62 | 0.00017 | -1.24 | 0.12    |
| 653  | O35814 | Stress-induced-phosphoprotein 1/STI1                | 63158 | 6.4  | 60000 | 7.6 | 9/19  | 13 | 70/56  | Protein folding         | Cytoplasm             | -1.13 | 0.17   | -1.54 | 0.00061 | -1.36 | 0.0013  |
| 2000 | Q4QU6  | Survival of motor neuron-related-splicing factor 30 | 26938 | 6.78 | 18000 | 6.3 | 6/11  | 21 | 62/56  | Translational control   | Nucleus               | 1.57  | 0.008  | 1.14  | 0.11    | -1.38 | 0.0033  |
| 604  | Q6P502 | T-complex protein 1 subunit gamma/TCP-1-gamma       | 61179 | 6.23 | 62000 | 7.5 | 14/23 | 25 | 134/56 | Protein folding         | Cytoplasm             | -1.06 | 0.34   | -1.53 | 0.0009  | -1.45 | 0.00054 |
| 1290 | P09495 | Tropomyosin alpha-4 chain/Tropomyosin-4             | 28549 | 4.66 | 43000 | 4.0 | 8/20  | 21 | 68/56  | Cytoskeleton            | Cytoplasm             | 1.47  | NA     | -1.16 | NA      | -1.71 | 0.0088  |
| 750  | Q6AYZ1 | Tubulin alpha-1C chain                              | 50590 | 4.96 | 58000 | 6.8 | 7/10  | 19 | 98/56  | Cytoskeleton            | Cytoplasm             | 1.29  | 0.18   | 1.79  | 0.019   | 1.38  | 0.049   |
| 753  | Q5XIF6 | Tubulin alpha-4A chain                              | 50634 | 4.95 | 58000 | 6.5 | 4/14  | 14 | 56/56  | Cytoskeleton            | Cytoplasm             | -1.36 | 0.026  | -1.54 | 0.0065  | -1.13 | 0.16    |
| 861  | P69897 | Tubulin beta-5 chain                                | 50095 | 4.78 | 52000 | 4.6 | 8/10  | 16 | 87/56  | Cytoskeleton            | Cytoplasm             | -1.19 | 0.17   | -1.6  | 0.0085  | -1.35 | 0.054   |
| 872  | P69897 | Tubulin beta-5 chain                                | 50095 | 4.78 | 52000 | 5.0 | 7/19  | 15 | 83/56  | Cytoskeleton            | Cytoplasm             | 1.07  | 0.24   | -1.44 | 0.02    | -1.54 | 0.0092  |

|      |        |                                                          |       |      |       |     |       |    |        |                         |           |       |        |       |         |       |        |
|------|--------|----------------------------------------------------------|-------|------|-------|-----|-------|----|--------|-------------------------|-----------|-------|--------|-------|---------|-------|--------|
| 1169 | P69897 | Tubulin beta-5 chain                                     | 50095 | 4.78 | 45000 | 6.5 | 5/23  | 13 | 76/56  | Cytoskeleton            | Cytoplasm | 1.6   | 0.061  | 2.83  | 0.027   | 1.77  | 0.025  |
| 1195 | P69897 | Tubulin beta-5 chain                                     | 50095 | 4.78 | 44000 | 6.5 | 12/20 | 27 | 138/56 | Cytoskeleton            | Cytoplasm | 1.25  | 0.054  | 2.2   | 0.00083 | 1.75  | 0.0022 |
| 603  | Q5PPN5 | Tubulin polymerization-promoting protein family member 3 | 19139 | 9.18 | 62000 | 6.6 | 7/27  | 38 | 89/56  | Cytoskeleton regulation | Cytoplasm | -1.26 | 0.0017 | -2    | 0.0017  | -1.59 | 0.01   |
| 1949 | Q6AY88 | Uncharacterized protein C1orf172 homolog                 | 44273 | 6.04 | 18000 | 6.4 | 6/17  | 13 | 58/56  | Unknown                 | Unknown   | -1.13 | 0.29   | -1.51 | 0.022   | -1.33 | 0.02   |
| 667  | P31000 | Vimentin                                                 | 53757 | 5.06 | 60000 | 5.2 | 13/38 | 28 | 146/56 | Cytoskeleton            | Cytoplasm | 1.07  | 0.46   | -1.43 | 0.083   | -1.53 | 0.026  |
| 931  | P31000 | Vimentin                                                 | 53757 | 5.06 | 50000 | 4.5 | 9/15  | 22 | 101/56 | Cytoskeleton            | Cytoplasm | 1.51  | 0.18   | 2.31  | 0.0057  | 1.53  | 0.024  |
| 986  | P31000 | Vimentin                                                 | 53757 | 5.06 | 48000 | 4.5 | 11/18 | 19 | 106/56 | Cytoskeleton            | Cytoplasm | 1     | 0.97   | 2.05  | 0.0078  | 2.04  | 0.014  |
| 1010 | P31000 | Vimentin                                                 | 53757 | 5.06 | 48000 | 4.4 | 9/29  | 18 | 96/56  | Cytoskeleton            | Cytoplasm | 1.03  | 0.97   | 3.02  | 0.00098 | 2.93  | 0.0054 |

---
